# Supplementary material for: Polarity control of DNA adsorption enabling the surface functionalization of CuO nanozymes for targeted tumor therapy
Source: Royal Society of Chemistry journal article supplement (doi:10.1039/d0mh01372b), 2020-12-10
Supplement: d0mh01372b1.pdf [file d0mh01372b1.pdf]

## Supporting Information

### **Polarity Control of DNA Adsorption Enabling Surface Functionalization of CuO**

#### **Nanozyme for Targeted Tumor Therapy**

Yingcai Meng<sup>1</sup>, Yuan Chen<sup>1</sup>, Jiaojiao Zhu<sup>1</sup>, Yan Qi<sup>2</sup>, Jinsong Ding<sup>1</sup>, Wenhui Zhou<sup>1\*</sup>

1. Xiangya School of Pharmaceutical Sciences, Central South University, Changsha, Hunan  
410013, China.

2. Department of Pathology, Shihezi University School of Medicine & the First Affiliated  
Hospital to Shihezi University School of Medicine, Shihezi, Xinjiang, 832002, China.

\*Email: zhouwenhuyaoji@163.com

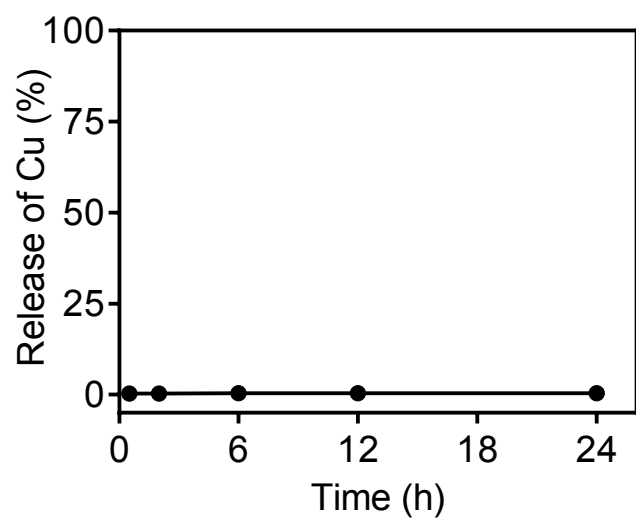

**Figure S1.** The release kinetics of Cu ions from CuO NPs.

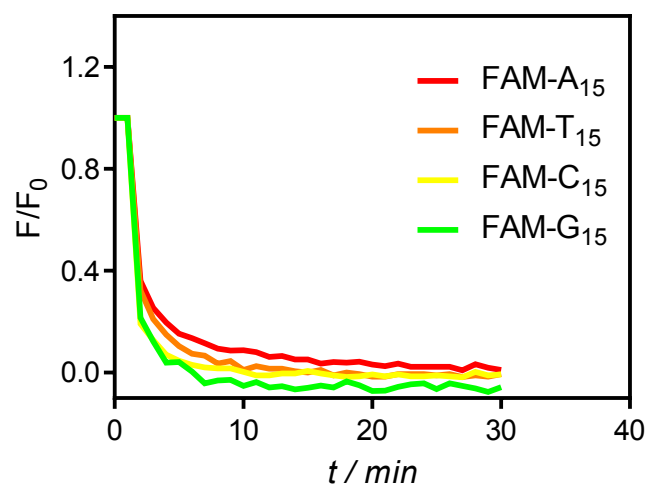

**Figure S2.** The adsorption of FAM-labeled 15-mer DNA homo-polymers (20 nM) by 50 µg/mL CuO NPs in HEPES buffer (10 mM, pH 7.6, 150 mM NaCl).

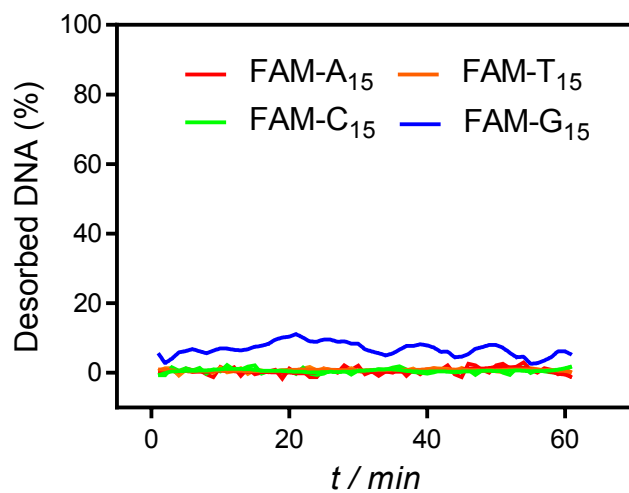

**Figure S3.** DNA desorption kinetics from CuO NPs surface in presence of 500 mM NaCl.

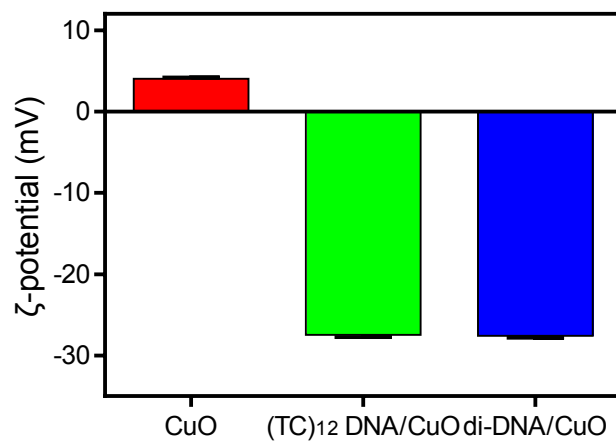

**Figure S4.** The  $\zeta$  potential of CuO NPs, (TC)<sub>12</sub> DNA/CuO and di-DNA/CuO.

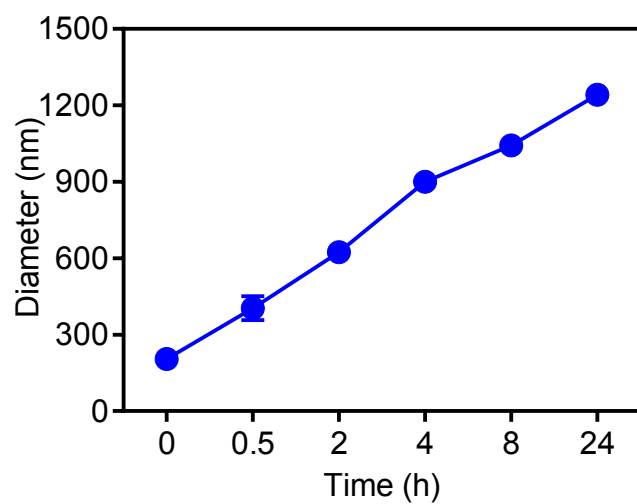

**Figure S5.** Colloidal stability of bare CuO NPs in water.

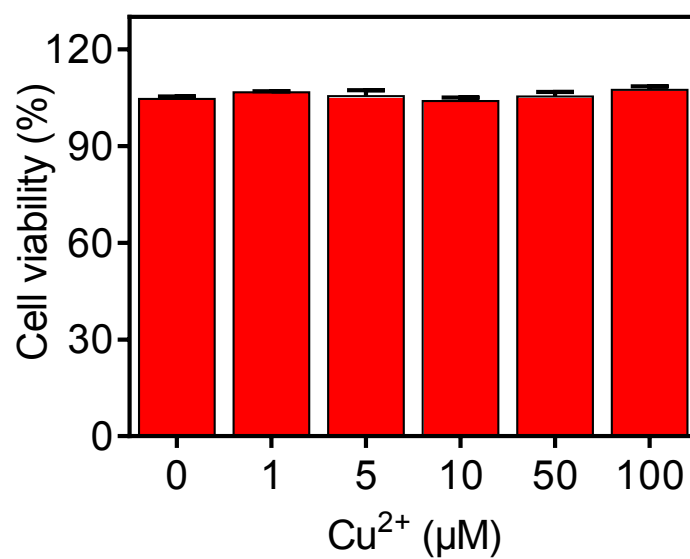

**Figure S6.** Cell viability of MDA-MB-231 cells after incubation with different  $\text{Cu}^{2+}$  concentrations for 24 h.

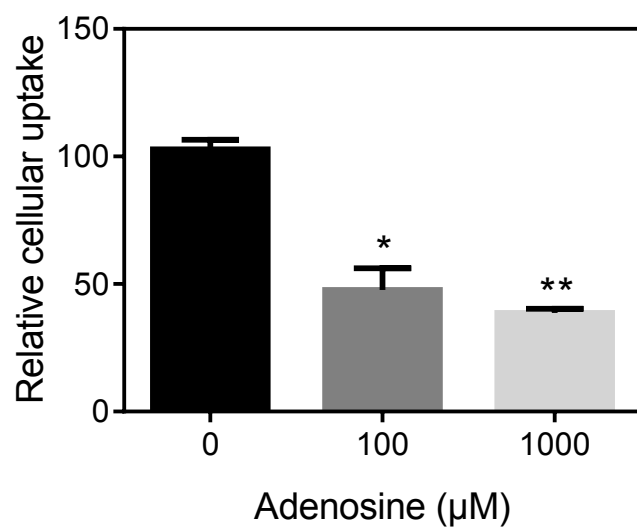

**Figure S7.** The cellular uptake of di-DNA/CuO by MDA-MB-231 cells without or with pretreatment of different concentrations of free adenosine. \* $P < 0.05$ , \*\* $P < 0.01$ .

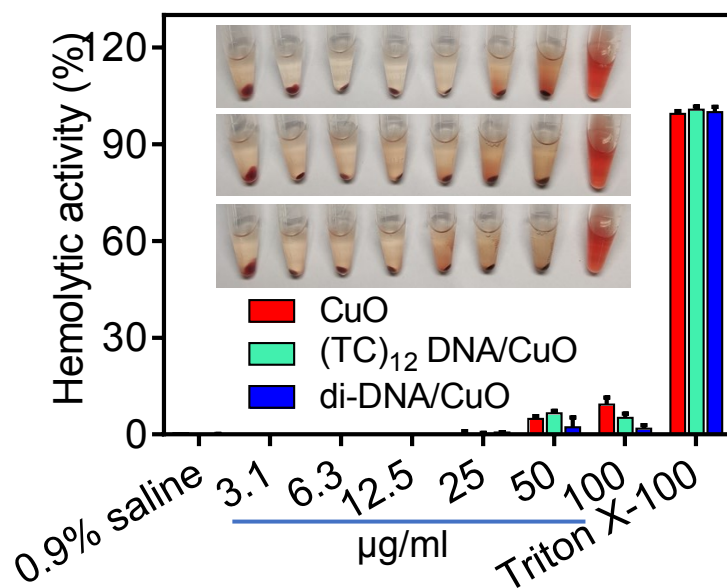

**Figure S8.** Hemolysis test of CuO, (TC)<sub>12</sub> DNA/CuO and di-DNA/CuO at different concentrations. Negative control and positive control were 0.9% saline and Triton X-100,

respectively. All these formulations showed minimal hemolysis as compared to the positive control, demonstrating the biosafety of the nano-systems for intravenous injection.

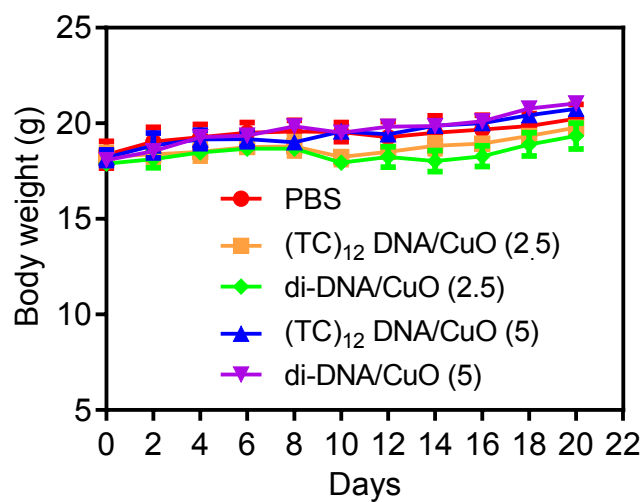

**Figure S9.** Dynamic monitoring the body weight for 20 days with different treatments.

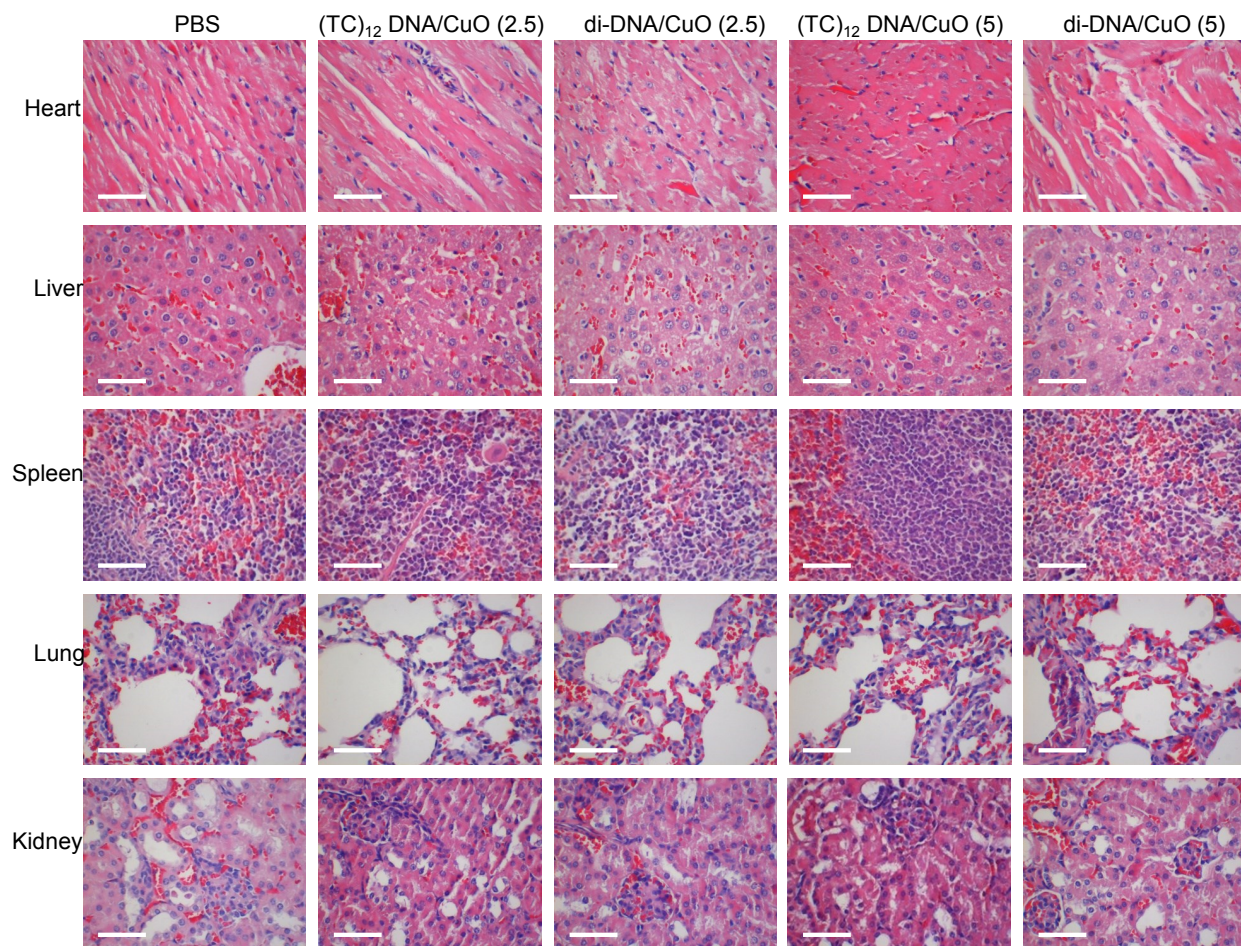

**Figure S10.** Representative H&E staining images of main organs (heart, liver, spleen, lung and kidney) after the treatments, scale bar = 50  $\mu\text{m}$ .
